# Supplementary material for: A first-principles study on the mechanical and thermodynamic properties of (Nb1−xTix)C complex carbides based on virtual crystal approximation
Source: Royal Society of Chemistry journal article supplement (doi:10.1039/c5ra22756a), 2015-01-01
Supplement: c5ra22756a1.pdf [file c5ra22756a1.pdf]

### Supplemental Material

#### A First-Principles Study on Mechanical and Thermodynamic Properties of $(\text{Nb}_{1-x}\text{Ti}_x)\text{C}$ Complex

#### Carbides Based on Virtual Crystal Approximation

Guomin Hua, Dongyang Li\*

Department of Chemical and Materials Engineering, University of Alberta, Edmonton, Alberta, Canada  
T6G 2V4

\* Email: [dongyang.li@ualberta.ca](mailto:dongyang.li@ualberta.ca)

**Table I** lattice constants (a), elastic constants( $C_{ij}$ ), bulk modulus (B), shear modulus(G), Young's modulus (E) and Hardness of  $(\text{Nb}_{1-x}\text{Ti}_x)\text{C}$  complex carbides

|                                              | a (Å)                                    | $C_{11}$ (GPa)     | $C_{12}$ (GPa)     | $C_{44}$ (GPa)     | B (GPa)            | G (GPa)            | E (GPa)            | Hardness (GPa)     |
|----------------------------------------------|------------------------------------------|--------------------|--------------------|--------------------|--------------------|--------------------|--------------------|--------------------|
| NbC                                          | 4.517                                    | 629.2              | 126.6              | 161.5              | 294.1              | 192.9              | 474.9              | 22.04              |
|                                              |                                          | 620 <sup>1</sup>   | 200 <sup>1</sup>   | 150 <sup>1</sup>   | 296 <sup>2</sup>   | 200 <sup>3</sup>   | 494 <sup>3</sup>   | 18~24 <sup>4</sup> |
| $(\text{Nb}_{0.75}\text{Ti}_{0.25})\text{C}$ | 4.511 <sup>v</sup><br>4.491 <sup>c</sup> | 608.8 <sup>v</sup> | 125.8 <sup>v</sup> | 173.6 <sup>v</sup> | 286.8 <sup>v</sup> | 198.2 <sup>v</sup> | 483.3 <sup>v</sup> | 22.85 <sup>v</sup> |
|                                              |                                          | 593.5 <sup>c</sup> | 125.5 <sup>c</sup> | 165.4 <sup>c</sup> | 281.5 <sup>c</sup> | 190.1 <sup>c</sup> | 465.6 <sup>c</sup> |                    |
| $(\text{Nb}_{0.5}\text{Ti}_{0.5})\text{C}$   | 4.495 <sup>v</sup><br>4.465 <sup>c</sup> | 569.0 <sup>v</sup> | 126.7 <sup>v</sup> | 185.5 <sup>v</sup> | 274.1 <sup>v</sup> | 199.0 <sup>v</sup> | 480.8 <sup>v</sup> | 22.98 <sup>v</sup> |
|                                              |                                          | 551.0 <sup>c</sup> | 123.1 <sup>c</sup> | 174.0 <sup>c</sup> | 265.7 <sup>c</sup> | 189.0 <sup>c</sup> | 458.4 <sup>c</sup> |                    |
| $(\text{Nb}_{0.25}\text{Ti}_{0.75})\text{C}$ | 4.464 <sup>v</sup><br>4.438 <sup>c</sup> | 517.3 <sup>v</sup> | 124.7 <sup>v</sup> | 191.4 <sup>v</sup> | 255.6 <sup>v</sup> | 193.3 <sup>v</sup> | 463.2 <sup>v</sup> | 22.11 <sup>v</sup> |
|                                              |                                          | 504.3 <sup>c</sup> | 119.5 <sup>c</sup> | 176.2 <sup>c</sup> | 247.8 <sup>c</sup> | 182.5 <sup>c</sup> | 439.6 <sup>c</sup> |                    |
| TiC                                          | 4.411                                    | 457.1              | 112.1              | 168.8              | 227.1              | 170.3              | 408.7              | 18.7               |
|                                              |                                          | 500 <sup>5</sup>   | 113 <sup>5</sup>   | 175 <sup>5</sup>   | 240 <sup>2</sup>   | 187 <sup>3</sup>   | 454 <sup>3</sup>   | 18~23 <sup>4</sup> |

Note: the superscript (v) denotes the data are calculated with virtual crystal approximation, (c) denotes the data are calculated based on cubic cell, the superscript number, from (1) to(5), denote the data are cited from ref.(1) to(5), respectively

**Table II** the ideal tensile strength (ITS),  $\sigma_{\text{max}}$ , the ideal shear strength(ISS),  $\tau_{\text{max}}$ , the tensile strain energy density ( $W_{\text{tensile}}$ ), the shear strain energy density ( $W_{\text{shear}}$ ), the reciprocal of brittleness ( $\beta^{-1}$ ) and the fracture toughness ( $K_{\text{IC}}$ ) of  $(\text{Nb}_{1-x}\text{Ti}_x)\text{C}$  complex carbides

|                                              | $\sigma_{\text{max}}$ (GPa) | $\tau_{\text{max}}$ (GPa) | $W_{\text{tensile}}$ (GPa) | $W_{\text{shear}}$ (GPa) | $\beta^{-1}$ | $K_{\text{IC}}$ (MPa·m <sup>1/2</sup> ) |
|----------------------------------------------|-----------------------------|---------------------------|----------------------------|--------------------------|--------------|-----------------------------------------|
| NbC                                          | 72.4                        | 28.4                      | 19.5                       | 4.8                      | 4.073        | 4.981                                   |
|                                              |                             |                           |                            |                          |              | 2.0~3.0 <sup>6</sup>                    |
|                                              |                             |                           |                            |                          |              | 3.0~4.0 <sup>4</sup>                    |
| $(\text{Nb}_{0.75}\text{Ti}_{0.25})\text{C}$ | 79.1                        | 29.0                      | 21.4                       | 4.9                      | 4.336        | 5.275                                   |
| $(\text{Nb}_{0.5}\text{Ti}_{0.5})\text{C}$   | 83.4                        | 28.6                      | 22.5                       | 4.9                      | 4.605        | 5.473                                   |
| $(\text{Nb}_{0.25}\text{Ti}_{0.75})\text{C}$ | 84.8                        | 27.5                      | 22.8                       | 4.6                      | 4.925        | 5.587                                   |
| TiC                                          | 83.3                        | 25.6                      | 21.6                       | 4.1                      | 5.229        | 5.366                                   |
|                                              |                             |                           |                            |                          |              | 2.0~4.0 <sup>7</sup>                    |
|                                              |                             |                           |                            |                          |              | 3.5~4.3 <sup>4</sup>                    |

Note: the superscript number (4) , (6) and (7) denote the data are cited from ref.(4) ,(6) and (7), respectively

## Reference

1. W. Weber, *Phys Rev B* **8** (11), 5082-5092 (1973).
2. H. O. Pierson, *Handbook of Refractory Carbides and Nitrides* (Noyes Publications, Park Ridge, N.J., 1996).
3. A. Nino, A. Tanaka, S. Sugiyama and H. Taimatsu, *Mater Trans* **51** (9), 1621-1626 (2010).
4. W. Acchar and C. A. Cairo, *Materials Research* **9**, 171-174 (2006).
5. D. R. Lide, *CRC Handbook of chemistry and physics*. (Taylor & Francis, Boca Raton, 2006).
6. B. R. Murphy and T. H. Courtney, *J Mater Res* **14** (11), 4285-4290 (1999).
7. C. Maerky, M. O. Guillou, J. L. Henshall and R. M. Hooper, *Mat Sci Eng a-Struct* **209** (1-2), 329-336 (1996).
